# Supplementary material for: Heterologous Expression of Wheat VERNALIZATION 2 (TaVRN2) Gene in Arabidopsis Delays Flowering and Enhances Freezing Tolerance
Source: PubMed Central journal article supplement (PMC2805711; doi:10.1371/journal.pone.0008690), 2010-01-13
Supplement: pone.0008690.s001.pdf [file pone.0008690.s001.pdf]

**Table S1: List of primers used in this study**

| <b>Table S1. Primers used for the different experiments on the characterization of the wheat <i>TaVRN2</i> gene.</b>                                                                        |                                                  |
|---------------------------------------------------------------------------------------------------------------------------------------------------------------------------------------------|--------------------------------------------------|
| <b>Primers used to clone genes and promoters of <i>TaVRN2</i>.</b>                                                                                                                          |                                                  |
| <i>TaVRN2-F</i>                                                                                                                                                                             | 5'-ATGTCCATGTCATGCGGTTTGT-3'                     |
| <i>TaVRN2-R</i>                                                                                                                                                                             | 5'-TTACCGGAACCATCCGAGGTGAA 3'                    |
| <i>TaVRN2-F2</i>                                                                                                                                                                            | 5'-GTTAAGCTTGGGGGAGAAGAGTCC-3'                   |
| <i>TaVRN2-R2</i>                                                                                                                                                                            | 5'-GGTGGTGGTGGTTGCCTTG-3'                        |
| <b>Primers used for the generation of construct used to overexpress <i>TaVRN2</i> in <i>Arabidopsis thaliana</i>. The restriction enzyme cutting sites used for cloning are underlined.</b> |                                                  |
| <i>TaVRN2-F3</i>                                                                                                                                                                            | 5'-CGGATCCTATGTCCATGTCATGCGGTTTGT-3'             |
| <i>TaVRN-R3</i>                                                                                                                                                                             | 5'-AGGAATTCTTACC <del>GA</del> ACCATCCGAGGTGA-3' |
| <b>Primers used for qRT-PCR analyses of transcripts expressed in wheat.</b>                                                                                                                 |                                                  |
| <i>TaVRN-B2/D2-F4</i>                                                                                                                                                                       | 5'-CCGACACATGGCTCACCTAGTG-3'                     |
| <i>TaVRN-B2/D2-R4</i>                                                                                                                                                                       | 5'-TTGCTTCATTGCTAATAGTGTGGT-3'                   |
| <i>TaVRN-A2-F5</i>                                                                                                                                                                          | 5'-CGACCCATGGCTCACCTAGT-3'                       |
| <i>TaVRN-A2-R5</i>                                                                                                                                                                          | 5'-TTGCTTCATTGCTAATAGTGTGGT-3'                   |
| <b><i>TaVRN2-PROBE</i></b>                                                                                                                                                                  | <b>5'-GGCAAGAGCCACATCGTGCCATTT-3'</b>            |
| <b>Primers used for RT-PCR analyses of transcripts expressed in <i>Arabidopsis thaliana</i> and in wheat.</b>                                                                               |                                                  |
| <i>AtCBF1-F</i>                                                                                                                                                                             | 5'-TGGAAAGCTATTTATACACCGGAAC-3'                  |
| <i>AtCBF1-R</i>                                                                                                                                                                             | 5'-GTACAAAAATGGAAACGACTATCGAAT-3'                |
| <i>AtCBF2-F</i>                                                                                                                                                                             | 5'-ACCTTGGTGGAGGCTATTTATACG-3'                   |
| <i>AtCBF2-R</i>                                                                                                                                                                             | 5'-CATTTGCATTTGACAACAACTTTTACC-3'                |
| <i>AtCBF3-F</i>                                                                                                                                                                             | 5'-CAGAGCGAAAATGCGTTTTATATGCA-3'                 |
| <i>AtCBF3-R</i>                                                                                                                                                                             | 5'-TAATTTACACTCGTTTTCTCAGTTTTACA-3'              |
| <i>AtCOR6.6-F</i>                                                                                                                                                                           | 5'-GTGTAACTTCGTGAAGGACAAG-3'                     |
| <i>AtCOR6.6-R</i>                                                                                                                                                                           | 5'-CAAACGTAGTACATCTAAAGGGAGA-3'                  |
| <i>AtCOR15a-F</i>                                                                                                                                                                           | 5'-GATACATTGGGTAAAGAAGCTGAGA-3'                  |
| <i>AtCOR15a-R</i>                                                                                                                                                                           | 5'-CGGTGACTGTGGATACCATATCTT-3'                   |
| <i>AtCOR78-F</i>                                                                                                                                                                            | 5'-GTTGAAGAGTCTCCACAATCACTT-3'                   |
| <i>AtCOR78-R</i>                                                                                                                                                                            | 5'-AATCCAATGATTTTACCCACTTTAGAC-3'                |
| <i>AtFCA-F</i>                                                                                                                                                                              | 5'-AATGTACCTGGACCGAGCATACCT-3'                   |
| <i>AtFCA-R</i>                                                                                                                                                                              | 5'-CTGCTGAACTTGTTGTGGTTGTTG-3'                   |
| <i>AtFLC-F</i>                                                                                                                                                                              | 5'-CGGTTGAAATCAAATCCAAAACA-3'                    |
| <i>AtFLC-R</i>                                                                                                                                                                              | 5'-CACACGAATAAGGTACAAAGTTCATC-3'                 |
| <i>AtFVE-F</i>                                                                                                                                                                              | 5'-ATGCAGATACTAAGTGGGCACCAA-3'                   |
| <i>AtFVE-R</i>                                                                                                                                                                              | 5'-AATCTGTCCCAATCGTTGTGATGT-3'                   |
| <i>AtSOC1-F</i>                                                                                                                                                                             | 5'-ACCATAGATCGTTATCTGAGGCAT-3'                   |
| <i>AtSOC1-R</i>                                                                                                                                                                             | 5'-GAAGAACAAGGTAACCCAATGAAC-3'                   |
| <i>AtFT-F</i>                                                                                                                                                                               | 5'-TAGTAAGCAGAGTTGTTGGAGACG-3'                   |
| <i>AtFT-R</i>                                                                                                                                                                               | 5'-GGGAAGGCCGAGATTGTAGAT-3'                      |
| <i>Actin2-F</i>                                                                                                                                                                             | 5'-TCAGATGCCAGAAAGTGTGTT-3'                      |
| <i>Actin2-R</i>                                                                                                                                                                             | 5'-CCGTACAGATCCTTCTGATAT-3'                      |
| <i>TaVRN2 forward</i>                                                                                                                                                                       | 5'-GGCGGCCGACACATGGCTCA-3'                       |
| <i>TaVRN2 reverse</i>                                                                                                                                                                       | 5'-TGGGCAGGCCACCACATCATC-3'                      |
| <i>TaVRT2 forward</i>                                                                                                                                                                       | 5'-GTGGCCGTTGCCGAAGCTGAAAAT-3'                   |
| <i>TaVRT2 reverse</i>                                                                                                                                                                       | 5'-CGCGCCATGCAAATGGAGACATAAAACGA-3'              |
| <i>TaVRN1 forward</i>                                                                                                                                                                       | 5'-GCTGAAGGGCTTCCAGCCCATATAAG-3'                 |
| <i>TaVRN1 reverse</i>                                                                                                                                                                       | 5'-TACATGGTAAATTGAGCCAGCTGGG-3'                  |
| <i>18S forward</i>                                                                                                                                                                          | 5'-AGTTAAAAAGCTCGTAGTTGGACCT-3'                  |
| <i>18S reverse</i>                                                                                                                                                                          | 5'-GTTTATGTTGAGACTAGGACGGTA-3'                   |
